# Supplementary material for: Preparation of magnetic mesoporous carbon from polystyrene-grafted magnetic nanoparticles for rapid extraction of chlorophenols from water samples
Source: Royal Society of Chemistry journal article supplement (doi:10.1039/c7ra00523g), 2017-01-01
Supplement: c7ra00523g1.pdf [file c7ra00523g1.pdf]

**Preparation of magnetic mesoporous carbon from polystyrene-grafted magnetic nanoparticles for rapid extraction of chlorophenols from water samples**

Shan Xue, Chaozhan Wang\*, Yinmao Wei

*Synthetic and Natural Functional Molecule Chemistry of Ministry of Education Key Laboratory,  
College of Chemistry and Materials Science, Northwest University, Xi'an 710127, Shannxi, China*

\* Corresponding authors: Prof. Chaozhan Wang, College of Chemistry and Materials Science,  
Northwest University, 1 Xue Fu Avenue, Changan District, Xi'an 710127, P R China. Tel/Fax:  
+86-29-81535026, Email: [czwang@nwu.edu.cn](mailto:czwang@nwu.edu.cn) (C. Wang)

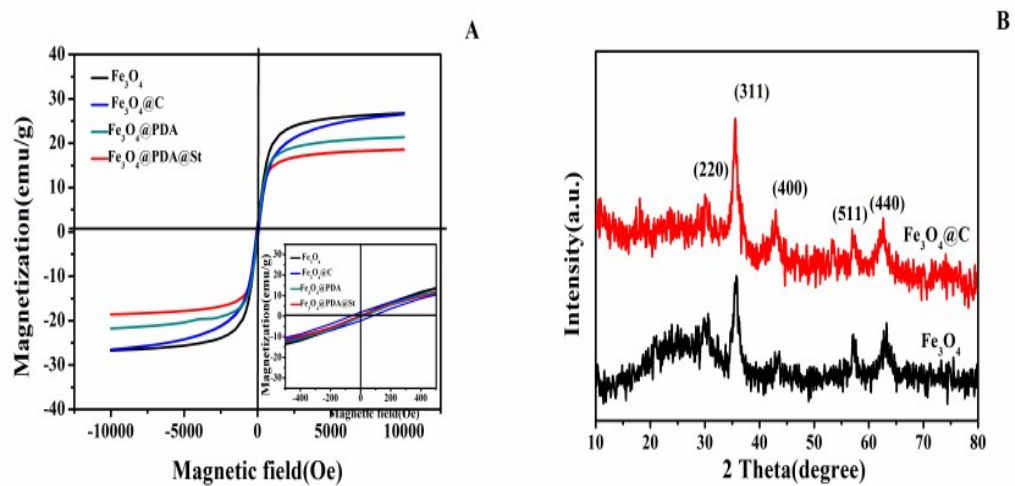

Fig.S1. Magnetization curves of  $\text{Fe}_3\text{O}_4$ ,  $\text{Fe}_3\text{O}_4@\text{PDA}$ ,  $\text{Fe}_3\text{O}_4@\text{PDA}@St$  and  $\text{Fe}_3\text{O}_4@\text{C}$  (A) and XRD patterns of  $\text{Fe}_3\text{O}_4$  and  $\text{Fe}_3\text{O}_4@\text{C}$  (B).

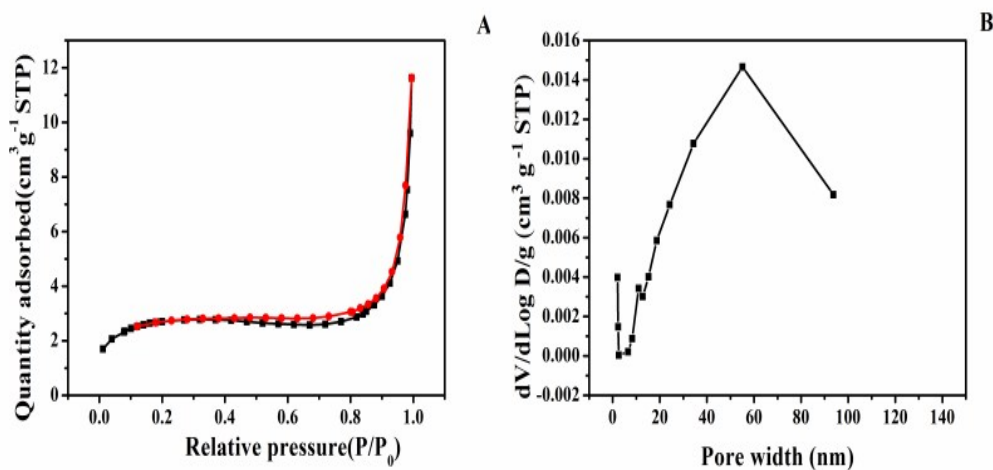

Fig.S2.  $\text{N}_2$  adsorption-desorption (A) and pore size distribution (B) of  $\text{Fe}_3\text{O}_4@\text{C}$ .

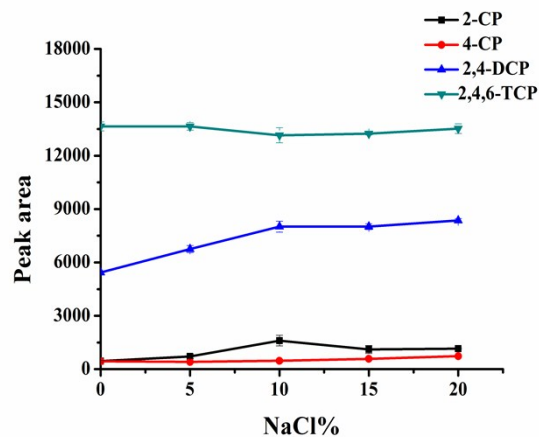

Fig.S3. Effect of salt concentration on the extraction of CPs. CPs concentrations are all at 1.0  $\mu\text{g/mL}$ . pH values, 5; Sample volume, 10 mL; amount of adsorbent, 5 mg; elution solution, 1 mL alkaline methanol; extraction time, 30 min; desorption time, 30 min.

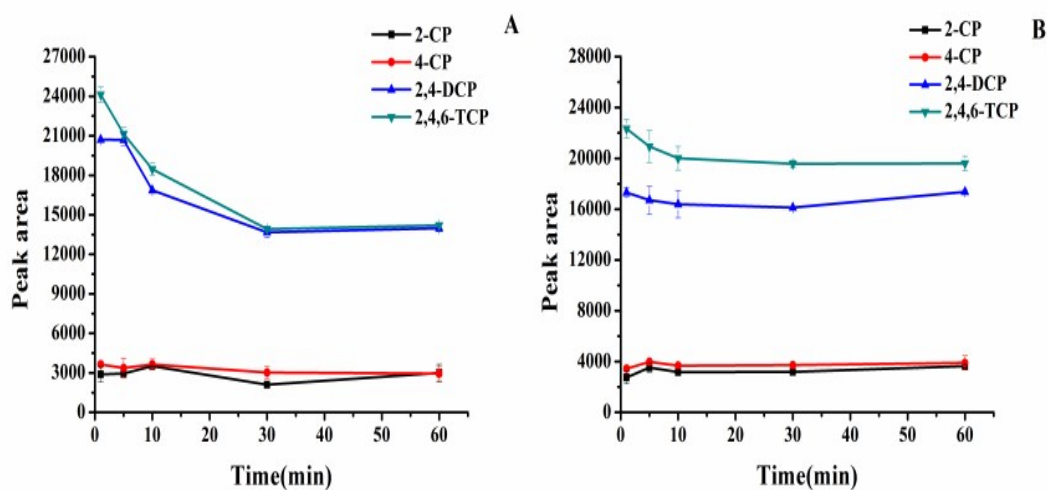

Fig.S4. Effect of extraction time (A) and desorption time (B) on the extraction of CPs. CPs concentrations are all at 1.0  $\mu\text{g/mL}$ . Salt concentration, 10% (m/v); pH values, 5; Sample volume, 10 mL; amount of adsorbent, 5 mg; elution solution, 1 mL alkaline methanol.
